# Supplementary material for: Perchloric acid adsorbed on silica gel as a new, highly efficient, and versatile catalyst for acetylation of phenols, thiols, alcohols, and amines
Source: Royal Society of Chemistry journal article supplement (doi:10.1039/b304178f), 2003-01-01
Supplement: b304178f.doc [file b304178f.doc]

# ANNEXURE I

**COMPARISON OF HClO4-SiO2 WITH OTHER REPORTED CATALYSTS**

**Manuscript No. B304178F**

### Manuscript Title: Perchloric Acid Adsorbed on Silica Gel as a New, Highly Efficient, and Versatile Catalyst for Acetylation of Phenols, Thiols, Alcohols, and Amines.

### Authors: Asit K. Chakraborti* and Rajesh Gulhane

***Corresponding author: akchakraborti@niper.ac.in**

The examples demonstrating the advantages of HClO4-SiO2 over the reported acetylation catalysts could be analyzed as advantages in terms of the: (**1**) amount of catalyst/acylating agent required, necessity to use solvent with the reported catalyst, reaction temperature, and reaction time so as to provide comparable yields with a common substrates, and (**2**) reaction with sensitive substrates.

**1)** Advantages of HClO4-SiO2 over other acetylation catalysts in terms of the amount of catalyst/acylating agent required, necessity to use solvent, reaction temperature, and reaction time:

**S. No. Substrate Catalyst Ac2O Conditions Yield**

**(mol %) (Equiv)* (Solv, Temp., Time) (%)Ref**

1. **Reactions with Phenols/Thiols/Amines:**

1 2-Naphthol/Phenol KSF (20 mg/mmol) 2.0 DCM, 40°C, 2 h 9811

HSZ (20 mg/mmol) 2.0 Neat, 60°C, 1.5 h 10012

Yttria-zirconia (20% wt) 1.5 MeCN, Reflux, 12 h 9714

TaCl5 (10) 1.5 DCM, RT, ? 811

In(OTf)3 (0.1) 1.5 MeCN, RT, 15 min 978

**HClO4-SiO2 (1) 1.0 Neat, RT, 5 min 93**

2 4-Methoxyphenol KSF (20 mg/mmol) 2.0 Neat, RT, 4.5 h 9211

**HClO4-SiO2 (1) 1.0 Neat, RT, 15 min 94**

3 4-Bromophenol Cu(OTf)2 (2.5) 2.0 DCM, RT, 2 h 937

**HClO4-SiO2 (1) 1.0 Neat, RT, 30 min 92**

4 4-Hydroxy Cu(OTf)2 (2.5) 2.0 DCM, RT, 2 h 937

acetophenone **HClO4-SiO2 (1) 1.0 Neat, RT, 15 min 99**

5 4-Nitrophenol Bi(OTf)3 (0.1) 1.5 MeCN, RT, 30 min 909

KSF (20 mg/mmol) 2.0 DCM, 40°C, 2.5 h 9811

**HClO4-SiO2 (1) 1.0 Neat, RT, 30 min 91**

6 Hydroquinone Bi(OTf)3 (0.1) 1.5 MeCN, RT, 40 min 889

KSF (20 mg/mmol) 2.0 Neat, RT, 2.0 h 9811

**HClO4-SiO2 (1) 1.0 Neat, RT, 5 min 83**

7 Catechol Bi(OTf)3 (0.1) 1.5 MeCN, RT, 15 min 859

KSF (20 mg/mmol) 2.0 Neat, RT, 3.0 h 9811

**HClO4-SiO2 (1) 1.0 Neat, RT, 15 min 97**

8 Resorcinol Bi(OTf)3 (0.1) 1.5 MeCN, RT, 15 min 929

KSF (20 mg/mmol) 2.0 CHCl3, 62°C, 3.0 h 7811

**HClO4-SiO2 (1) 1.0 Neat, RT, 10 min 91**

9 2,4,6-Trimethyl Bi(OTf)3 (1.0) 10 DCM, RT, 2.5 h 929

phenol **HClO4-SiO2 (1) 1.0 Neat, RT, 15 min 94**

10 2,6-Di-*tert*-butyl-4- Sc(OTf)3 (1.0) 1.5 MeCN, RT, 1 h 954

methylphenol **HClO4-SiO2 (1) 1.5 Neat, RT, 15 min 100**

11 Thiophenol KSF (20 mg/mmol) 2.0 Neat, RT, 5 h 9211

Nafion-H (15 mg/mmol) 2.0 DCM, RT, 2 h 9913

Yttria-zirconia (20% wt) 1.5 MeCN, Reflux, 10 h 9714

**HClO4-SiO2 (1) 1.0 Neat, RT, 5 min 93**

12 4-Methylthiophenol Yttria-zirconia (20% wt) 1.5 MeCN, Reflux, 6 h 9414

**HClO4-SiO2 (1) 1.0 Neat, RT, 15 min 92**

13 -Toluenethiol Yttria-zirconia (20% wt) 1.5 MeCN, Reflux, 6 h 9714

**HClO4-SiO2 (1) 1.0 Neat, RT, 30 min 90**

14 2-Nitroaniline KSF (20 mg/mmol) 2.0 DCM, 40°C, 3.5 h 8711

**HClO4-SiO2 (1) 1.0 Neat, RT, 15 min 83**

1. **Reactions with Alcohols with Ac2O:**

1 1-Phenylethanol TaCl5 (10) 1.5 DCM, RT, ? 801

Cu(OTf)2 (2.5) 2.0 DCM, RT, 1 h 927

TMSOTf (2) 1.5 DCM, 0°C, 5 min 955

Sc(OTf)3 (0.1) 1.5 MeCN, 0°C,1 h 954

Bi(OTf)3 (0.1) 1.5 MeCN, RT, 45 min 929

In(OTf)3 (0.1) 1.5 MeCN, RT, 30 min 988

**HClO4-SiO2 (1) 1.0 MeCN, RT, 60 min 87**

2 2-Phenylethanol Bi(OTf)3 (0.5) 1.5 DCM, RT, 4 h 929

**HClO4-SiO2 (1) 1.0 Neat, RT, 30 min 90**

3 Benzoin Bi(OTf)3 (0.1) 1.5 MeCN, RT, 3 h 859

**HClO4-SiO2 (1) 1.0 Neat, RT, 15 min 82**

4 (-) or (+)-Menthol HSZ (20 mg/mmol) 2.0 Neat, 60°C, 1 h 10012

Nafion-H (15 mg/mmol) As solvent Ac2O, RT, 6 h 9613 Yttria-zirconia (20% wt) 1.5 MeCN, Reflux, 6 h 9614

TaCl5 (10) 1.5 DCM, RT, ? 791

Cu(OTf)2 (2.5) 2.0 DCM, RT, 30 min 987

Sc(OTf)3 (1) 1.5 MeCN, 0°C, 15 min 954

Sc(NTf2)3 (1) 1.2 MeCN, 0°C, 60 min 996

Bi(OTf)3 (0.1) 1.5 MeCN, RT, 45 min 859

In(OTf)3 (0.1) 1.5 MeCN, RT, 30 min 958

**HClO4-SiO2 (1) 1.0 Neat, RT, 5 min 90**

5 Borneol Bi(OTf)3 (0.5) 10 THF, RT, 7 h 999

**HClO4-SiO2 (1) 1.0 Neat, RT, 45 min 92**

6 -D-Glucose K-10 (500 mg/mmol) As solvent Ac2O, RT, 6 h 9411

Nafion-H (15 mg/mmol) As solvent Ac2O, RT, 14 h 8113

**HClO4-SiO2 (1) 1.0 Neat, RT, 30 min 89**

7 Linalool Bi(OTf)3 (0.5) 10 THF, RT, 12 h 889

Cu(OTf)2 (2.5) 2.0 DCM, 0°C, 12 h 797

# TMSOTf (0.5) 5.0 Ac2O, -10°C, 5 min Nil5

Sc(OTf)3 (2) As solvent Ac2O, -20°C, 2.5 h 684

**HClO4-SiO2 (1) 1.0 MeCN, RT, 60 min 80**

8 Propargyl alcohol HSZ (20 mg/mmol) 2.0 Neat, 60°C, 1 h 10012

**HClO4-SiO2 (1) 1.0 Neat, RT, 30 min 100**

# 9 3-Methyl-1-pentyn- TMSOTf (2) 2.0 DCM, 0°C, 60 min 805

3-ol **HClO4-SiO2 (1) 1.0 Neat, RT, 30 min 100**

10 2-Methyl-3-butyn- HSZ (20 mg/mmol) 2.0 Neat, 60°C, 1 h 9812 2-ol **HClO4-SiO2 (1) 1.0 Neat, RT, 30 min 100**

11 1-Methyl-1- TMSOTf (5) 5 Ac2O, -10°C, 2 min 1005

cyclohexanol Sc(OTf)3 (1) 5 MeCN, -20°C,5 h 914

**HClO4-SiO2 (1) 1.0 MeCN, RT, 30 min 92**

12 1-Ethynylcyclo Bi(OTf)3 (0.5) 10 MeCN, RT, 4 h 949

hexanol Sc(OTf)3 (0.5) 10 MeCN, RT, 4 h 889

TMSOTf (10) 10 DCM, RT, 2 h 689

**HClO4-SiO2 (1) 1.0 MeCN, RT, 15 min 90**

13 1-Adamantanol Sc(OTf)3 (1.0) 1.5 MeCN, RT, 1 h 954

Bi(OTf)3 (0.01) 10 Ac2O, RT, 6 h 989

Sc(OTf)3 (0.5) 10 MeCN, RT, 8.5 h 999

TMSOTf (10) 10 DCM, RT, 3.5 h 949

**HClO4-SiO2 (1) 1.0 Neat, RT, 15 min 90**

1. **Reactions with Alcohols with HOAc:** **HOAc**

**(Equiv)**

1 1-Phenylethanol Cu(OTf)2 (2.5) 2 mL/mmol HOAc, 65°C, 14 h 947

Sc(OTf)3 (5) 2 mL/mmol HOAc, 65°C, 2 h 9813

**HClO4-SiO2 (1) 5.0 RT, 6 h 90**

**65°C, 0.5 h 90**

2 2-Phenylethanol Sc(OTf)3 (5) 2 mL/mmol HOAc, RT, 24 h 9913 **HClO4-SiO2 (1) 5.0 RT, 2 h 90**

3 Benzylalcohol Cu(OTf)2 (2.5) 2 mL/mmol HOAc, RT, 8 h 947

**HClO4-SiO2 (1) 5.0 RT, 6 h 94**

4 (-) or (+)-Menthol Cu(OTf)2 (2.5) 2 mL/mmol HOAc, 65°C, 12 h 967

Sc(OTf)3 (5) 2 mL/mmol HOAc, 65°C, 24 h 9913

**HClO4-SiO2 (1) 5.0 RT, 6 h 97**

**65°C, 0.5 h 95**

5 1-Adamantanol Sc(OTf)3 (5.0) 5 mL/mmol HOAc, 110°C, 0.5 h 7113

**HClO4-SiO2 (1) 5 mL/mmol HOAc, 110°C, 0.5 h 80**

*Molar equivalent per OH/SH/NH2 group.

The various catalytic methods may be summarized with respect to the amount of acetylating agent, temperature, need to use solvent, reaction time, and cost of the catalyst as follow:

1. **Amount of Acetylating Agent:** The amounts of Ac2O (equivalent) require for the reported catalysts: Sc(OTf)3 (1.5–as solvent); Sc(NTf2)3 (1.2); clays (2.0), zeolite (2.0); Nafion-H (2.0- as solvent); yttria-zirconia (1.1 – as solvent); TMSOTf (1.5-as solvent); Cu(OTf)2 (2.0); Bi(OTf)3 (1.5–10); **HClO4-SiO2 (1).**

**II) Reaction Temperature:** High temperature is required for the reported catalysts: clays (40-80 °C); zeolite (60 °C); yttria-zirconia (85°C); **HClO4-SiO2 (Room temperature).**

Low temperature for acid-sensitive substrates: Cu(OTf)2 (0°C); Sc(NTf2)3 (0 °C); Sc(OTf)3 (-20 to -50 °C); TMSOTf (-10 °C); **HClO4-SiO2 (Room temperature).**

**III) Requirement of Solvent:** The reported catalysts require solvent for acetylation to take place: Sc(OTf)3 (MeCN or Ac2O); Sc(NTf2)3 (MeCN); clays (DCM or CHCl3); Nafion-H (DCM); yttria-zirconia (dry MeCN); TMSOTf (DCM, MeCN/EtOAc, Ac2O);Cu(OTf)2 (MeCN), Bi(OTf)3 (MeCN, THF, Toluene, DCM); **HClO4-SiO2 (No solvent is required in general).**

**IV) Reaction Time:** The acetylaion with the reported catalysts require longer time: Sc(OTf)3 (0.5-5 h); Sc(NTf2)3 (1 h for acetylation of menthol); clays (2.5 h); zeolite (1.5-12 h); Nafion-H (2-20 h); yttria-zirconia (4-12 h); Cu(OTf)2 (1-2 h); Bi(OTf)3 (1-8.5 h); **HClO4-SiO2 (2 – 60 min).**

**V) Cost of the Catalyst:** Aldrich (India) 2000-2001 price (US $): In(OTf)3 (50 g, 362.20); Cu(OTf)2 (50 g, 384.80); Sc(OTf)3 (50 g, 1590.00); estimated price (not being commercially available) (US $): Sc(NTf2)3 (50 g, >4896.00); estimated price (not being commercially available) (US $): Bi(OTf)3.xH2O (50 g, >315.95); **HClO4 (50 g, ~2.2)**.

**2)** Advantages of HClO4-SiO2as acetylation catalyst for acid sensitive substrate:

**i)** Acetylation of 1-methyl-1-cyclohexanol requires 5 equiv of Ac2O and low temp (-20°C) when the reaction was catalysed by Sc(OTf)3 to suppress dehydration (even under this condition 9 % of the olefinic product was formed). For similarly reason, the TMSOTf catalysed acetylation of the substrate require 5 equiv of Ac2O and low temp (-10°C). In both of these cases prolonged time (5 h) is required. In comparison to these, HClO4-SiO2 enables the reaction to be carried out at room temperature for 30 min with 1 equiv of Ac2O.

**ii)** Acetylation of 1-ethynyl-1-cyclohexanol requires 3 equiv of Ac2O and low temp (-20°C) for the reaction to be carried out in the presence of Sc(OTf)3 to avoid dehydration/rearrangement. The Sc(OTf)3 catalysed acylation of the substrate requires 10 equiv of Ac2O in MeCN and prolonged time (4 h). In comparison, HClO4-SiO2 enables the reaction to be carried out at room temperature for 15 min with 1 equiv of Ac2O .

**iii)** Acetylation of 1-adamantanol requires treatment with 10 equiv of Ac2O for 6 h for Bi(OTf)3 catalysed reaction to avoid side reaction. In comparison to these, HClO4-SiO2 enables the reaction to be carried out at room temperature for 15 min with 1 equiv of Ac2O in absence of solvent.

**iv)** Acetylation of linalool requires the use of Ac2O as solvent for 2.5 h at –20°C for the Sc(OTf)3 catalyzed affording 68 % of the acetylated derivative and 8 % of the rearranged product. Reaction catalyzed by TMSOTf failed to afford the expected product with Ac2O as solvent at –10°C for in 5 min reflecting the disadvantages of TMSOTf with acid-sensitive substrates. In comparison to these, HClO4-SiO2 enables the reaction to be carried out at room temperature for 60 min with 1 equiv of Ac2O in MeCN to afford 80 % yield of the acetate.
